## Supplementary Appendix S.1 – Descriptive Statistics – JLPS data

| JLPS data                                         | Obs.   | Mean | Std. Dev. | Min | Max |
|---------------------------------------------------|--------|------|-----------|-----|-----|
| <i>Individual-level variables</i>                 |        |      |           |     |     |
| Attitudes towards immigrants                      | 13,620 | 2.57 | 1.04      | 1   | 5   |
| <i>Qualifications</i>                             |        |      |           |     |     |
| Middle/High School                                | 22,948 | 0.31 |           | 0   | 1   |
| Technical/Two-year College                        | 22,948 | 0.33 |           | 0   | 1   |
| Four-year/Graduate Degree                         | 22,948 | 0.36 |           | 0   | 1   |
| <i>Tenure</i>                                     |        |      |           |     |     |
| Owned house                                       | 14,664 | 0.65 |           | 0   | 1   |
| Rental house (private)                            | 14,664 | 0.21 |           | 0   | 1   |
| Rental house (public housing)                     | 14,664 | 0.1  |           | 0   | 1   |
| Other - Please specify                            | 14,664 | 0.04 |           | 0   | 1   |
| <i>Employment Status</i>                          |        |      |           |     |     |
| Employed (non-manual)                             | 14,709 | 0.62 |           | 0   | 1   |
| Employed (manual)                                 | 14,709 | 0.21 |           | 0   | 1   |
| Employed (other)                                  | 14,709 | 0.01 |           | 0   | 1   |
| Non-employed (unemployed)                         | 14,709 | 0.04 |           | 0   | 1   |
| Non-emp (in education)                            | 14,709 | 0.01 |           | 0   | 1   |
| Non-emp (domestic work)                           | 14,709 | 0.1  |           | 0   | 1   |
| Non-emp (other)                                   | 14,709 | 0.01 |           | 0   | 1   |
| <i>Age</i>                                        |        |      |           |     |     |
| 21-25                                             | 23,052 | 0.06 |           | 0   | 1   |
| 26-29                                             | 23,052 | 0.15 |           | 0   | 1   |
| 30-34                                             | 23,052 | 0.23 |           | 0   | 1   |
| 35-39                                             | 23,052 | 0.26 |           | 0   | 1   |
| 40-44                                             | 23,052 | 0.23 |           | 0   | 1   |
| 45+                                               | 23,052 | 0.07 |           | 0   | 1   |
| <i>Sex</i>                                        |        |      |           |     |     |
| Male                                              | 23,052 | 0.48 |           | 0   | 1   |
| Female                                            | 23,052 | 0.52 |           | 0   | 1   |
| <i>Marital Status</i>                             |        |      |           |     |     |
| Married                                           | 14,745 | 0.59 |           | 0   | 1   |
| Unmarried (never married)                         | 14,745 | 0.37 |           | 0   | 1   |
| Other (divorced, widowed)                         | 14,745 | 0.04 |           | 0   | 1   |
| Subjective Social Status placement                | 14,541 | 5.02 | 1.63      | 1   | 10  |
| <i>City Size</i>                                  |        |      |           |     |     |
| Towns or villages                                 | 14,739 | 0.08 |           | 0   | 1   |
| Cities with less than 200,000 residents           | 14,739 | 0.34 |           | 0   | 1   |
| Cities with equal or more than 200,000 residents  | 14,739 | 0.24 |           | 0   | 1   |
| 16 largest cities                                 | 14,739 | 0.34 |           | 0   | 1   |
| <i>Evaluation of household standard of living</i> |        |      |           |     |     |
| Poor                                              | 14,648 | 0.04 |           | 0   | 1   |
| Somewhat poor                                     | 14,648 | 0.15 |           | 0   | 1   |
| Average                                           | 14,648 | 0.61 |           | 0   | 1   |
| Somewhat wealthy                                  | 14,648 | 0.17 |           | 0   | 1   |
| Wealthy                                           | 14,648 | 0.03 |           | 0   | 1   |

*Prefectural-level variables*

|                                                |        |       |       |      |      |
|------------------------------------------------|--------|-------|-------|------|------|
| financial capability index                     | 12,079 | 0.65  | 0.24  | 0.22 | 1.16 |
| Unemployment Rate                              | 12,079 | 4.12  | 0.96  | 2.1  | 7.5  |
| Assistance Livelihood Rate                     | 12,079 | 15.04 | 7.67  | 2.37 | 34.2 |
| social welfare spending per capita             | 12,079 | 49.31 | 10.09 | 31.2 | 89   |
| ratio of expenditure for livelihood protection | 12,079 | 0.52  | 0.47  | 0.05 | 2.48 |
| Percent Foreign-born                           | 12,079 | 1.76  | 0.88  | 0.29 | 3.22 |

---

## Supplementary Appendix S.2 – Descriptive Statistics – PSPP data

| PSPP data                                             |       |       |           |      |       |
|-------------------------------------------------------|-------|-------|-----------|------|-------|
|                                                       | Obs.  | Mean  | Std. Dev. | Min  | Max   |
| <i>Individual-level data</i>                          |       |       |           |      |       |
| Immigration attitudes                                 | 3,688 | 2.57  | 0.7       | 1    | 4     |
| Local Contact                                         | 3,849 | 1.8   | 0.92      | 0    | 3     |
| Threat - culture impaired                             | 3,784 | 2.88  | 1.12      | 1    | 5     |
| Threat - disturbed order                              | 3,788 | 3.68  | 1.02      | 1    | 5     |
| Threat - jobs deprived                                | 3,780 | 2.94  | 1.07      | 1    | 5     |
| Threat - welfare costs                                | 3,775 | 3.42  | 1.08      | 1    | 5     |
| Threat - crime                                        | 3,799 | 3.88  | 0.98      | 1    | 5     |
| Threat - do not contribute to society                 | 3,776 | 2.73  | 1.06      | 1    | 5     |
| Threat - do not contribute to economy                 | 3,777 | 2.64  | 0.99      | 1    | 5     |
| Threat - diversified culture                          | 3,777 | 2.29  | 0.96      | 1    | 5     |
| <i>Sex</i>                                            |       |       |           |      |       |
| Male                                                  | 3,859 | 0.47  |           | 0    | 1     |
| Female                                                | 3,859 | 0.53  |           | 0    | 1     |
| <i>Travelled to foreign countries</i>                 |       |       |           |      |       |
| No                                                    | 3,854 | 0.33  |           | 0    | 1     |
| Yes                                                   | 3,854 | 0.67  |           | 0    | 1     |
| <i>Lived in foreign countries (more than 1 month)</i> |       |       |           |      |       |
| No                                                    | 3,846 | 0.93  |           | 0    | 1     |
| Yes                                                   | 3,846 | 0.07  |           | 0    | 1     |
| <i>Live in the prefecture you were born?</i>          |       |       |           |      |       |
| No                                                    | 3,853 | 0.35  |           | 0    | 1     |
| Yes                                                   | 3,853 | 0.65  |           | 0    | 1     |
| <i>Marital Status</i>                                 |       |       |           |      |       |
| Married                                               | 3,837 | 0.69  |           | 0    | 1     |
| Unmarried (never married)                             | 3,837 | 0.18  |           | 0    | 1     |
| Separation/Bereaved/Other                             | 3,837 | 0.12  |           | 0    | 1     |
| <i>Employment Status</i>                              |       |       |           |      |       |
| Working                                               | 3,726 | 0.66  |           | 0    | 1     |
| Student                                               | 3,726 | 0.03  |           | 0    | 1     |
| Unemployed                                            | 3,726 | 0.04  |           | 0    | 1     |
| Not in work                                           | 3,726 | 0.27  |           | 0    | 1     |
| <i>Qualifications</i>                                 |       |       |           |      |       |
| Junior High School                                    | 3,830 | 0.13  |           | 0    | 1     |
| Including high school                                 | 3,830 | 0.48  |           | 0    | 1     |
| Junior technical college                              | 3,830 | 0.13  |           | 0    | 1     |
| University                                            | 3,830 | 0.25  |           | 0    | 1     |
| Age                                                   | 3,880 | 55.54 | 16.41     | 18   | 99    |
| Subjective Social Status Placement                    | 3,780 | 3.07  | 0.84      | 1    | 5     |
| Years in area                                         | 3,880 | 42.77 | 20.83     | 0    | 99    |
| <i>Prefectural-level variables</i>                    |       |       |           |      |       |
| financial capability index                            | 3,857 | 0.65  | 0.21      | 0.3  | 1     |
| Unemployment Rate                                     | 3,857 | 2.99  | 0.49      | 1.9  | 4     |
| Assistance Livelihood Rate                            | 3,857 | 17.07 | 7.86      | 5.27 | 33.79 |
| social welfare spending per capita                    | 3,857 | 60.21 | 9.47      | 47.9 | 77.5  |
| ratio of expenditure for livelihood protection        | 3,857 | 0.55  | 0.51      | 0.07 | 2.25  |
| % foreign-born                                        | 3,857 | 1.88  | 0.93      | 0.37 | 3.68  |

*City-level variables*

|                             |       |      |      |      |       |
|-----------------------------|-------|------|------|------|-------|
| % non-completed high school | 3,857 | 2.53 | 1.12 | 0    | 6.09  |
| % unemployed                | 3,857 | 2.14 | 0.46 | 1.17 | 3.46  |
| % foreign-born              | 3,857 | 1.38 | 1.51 | 0.14 | 10.52 |

---

### Supplementary Appendix S.3 – Individual- and Prefectural-level drivers of Attitudes towards Immigration (JLPS)

|                                             | Model 1                      | Model 2                      | Model 3                      |
|---------------------------------------------|------------------------------|------------------------------|------------------------------|
| Outcome                                     | Attitudes towards immigrants | Attitudes towards immigrants | Attitudes towards immigrants |
| Model Type                                  | Random-Effects               | Fixed-Effects                | Fixed-Effects                |
| Time (t) independent variables are measured | $t_0$                        | $t_0$                        | $t_0$                        |
| Observations Sample                         | All                          | All                          | Prefecture Stayers           |
| <i>Individual-level Variables</i>           |                              |                              |                              |
| Year (cf. 2008)                             |                              |                              |                              |
| Year (2010)                                 | -0.053<br>(0.031)            | -0.003<br>(0.046)            | 0.042<br>(0.052)             |
| Year (2012)                                 | 0.081*<br>(0.036)            | 0.053<br>(0.054)             | 0.117<br>(0.064)             |
| Year (2014)                                 | 0.229***<br>(0.039)          | 0.122<br>(0.071)             | 0.201*<br>(0.082)            |
| Qualifications (cf. Middle/High School)     |                              |                              |                              |
| Technical/Two-year College                  | 0.084*<br>(0.034)            | -<br>-                       | -<br>-                       |
| Four-year/Graduate Degree                   | 0.167***<br>(0.035)          | -<br>-                       | -<br>-                       |
| Tenure (cf. Owned house)                    |                              |                              |                              |
| Rental house (private)                      | 0.065*<br>(0.026)            | 0.070*<br>(0.035)            | 0.074*<br>(0.038)            |
| Rental house (public housing)               | 0.135***<br>(0.032)          | 0.146***<br>(0.044)          | 0.141**<br>(0.046)           |
| Other                                       | -0.006<br>(0.049)            | -0.025<br>(0.067)            | 0.004<br>(0.075)             |
| Employment status (cf. Employed non-manual) |                              |                              |                              |
| Employed (manual)                           | -0.077*<br>(0.031)           | -0.001<br>(0.049)            | -0.018<br>(0.051)            |
| Employed (other)                            | 0.075<br>(0.098)             | 0.268<br>(0.150)             | 0.247<br>(0.161)             |
| Non-employed (unemployed)                   | -0.032<br>(0.047)            | 0.007<br>(0.056)             | 0.016<br>(0.058)             |
| Non-emp (in education)                      | -0.126<br>(0.113)            | -0.014<br>(0.140)            | 0.075<br>(0.159)             |
| Non-emp (domestic work)                     | -0.065<br>(0.038)            | -0.081<br>(0.052)            | -0.095<br>(0.055)            |
| Non-emp (other)                             | -0.047<br>(0.104)            | -0.013<br>(0.133)            | -0.061<br>(0.139)            |
| Age (cf. 21-25)                             |                              |                              |                              |
| 26-29                                       | -0.116**<br>(0.044)          | -0.045<br>(0.058)            | -0.019<br>(0.063)            |
| 30-34                                       | -0.164***<br>(0.046)         | -0.059<br>(0.081)            | 0.012<br>(0.086)             |
| 35-39                                       | -0.130**<br>(0.048)          | 0.055<br>(0.107)             | 0.110<br>(0.112)             |
| 40-44                                       | -0.168**<br>(0.052)          | 0.086<br>(0.132)             | 0.137<br>(0.137)             |

|                                                       |                     |                     |                     |
|-------------------------------------------------------|---------------------|---------------------|---------------------|
| 45+                                                   | -0.181**<br>(0.063) | 0.114<br>(0.157)    | 0.167<br>(0.163)    |
| Sex (cf. Male)                                        |                     |                     |                     |
| Female                                                | -0.048<br>(0.029)   | -<br>-              | -<br>-              |
| Marital Status (cf. Married)                          |                     |                     |                     |
| Unmarried (never married)                             | -0.027<br>(0.028)   | 0.044<br>(0.055)    | 0.052<br>(0.061)    |
| Other (divorced, widowed)                             | -0.037<br>(0.057)   | -0.033<br>(0.089)   | -0.039<br>(0.093)   |
| Subjective Social Status placement                    | 0.015*<br>(0.007)   | 0.005<br>(0.009)    | 0.010<br>(0.010)    |
| City size (cf. towns or villages)                     |                     |                     |                     |
| Cities with less than 200,000 residents               | -0.028<br>(0.046)   | -0.039<br>(0.093)   | -0.090<br>(0.104)   |
| Cities with equal or more than 200,000 residents      | -0.022<br>(0.048)   | -0.013<br>(0.099)   | -0.053<br>(0.111)   |
| 16 largest cities                                     | -0.035<br>(0.050)   | -0.001<br>(0.106)   | 0.028<br>(0.124)    |
| Evaluation of household standard of living (cf. Poor) |                     |                     |                     |
| Somewhat poor                                         | 0.100<br>(0.054)    | 0.055<br>(0.066)    | 0.065<br>(0.068)    |
| Average                                               | 0.164**<br>(0.054)  | 0.116<br>(0.070)    | 0.128<br>(0.072)    |
| Somewhat wealthy                                      | 0.179**<br>(0.060)  | 0.135<br>(0.077)    | 0.147<br>(0.079)    |
| Wealthy                                               | 0.309***<br>(0.076) | 0.305**<br>(0.098)  | 0.259*<br>(0.103)   |
| <i>Prefectural-level Variables</i>                    |                     |                     |                     |
| financial capability index                            | 0.088<br>(0.109)    | 0.200<br>(0.192)    | 0.154<br>(0.216)    |
| Unemployment Rate                                     | 0.051*<br>(0.024)   | -0.012<br>(0.037)   | -0.016<br>(0.039)   |
| Assistance Livelihood Rate                            | -0.007*<br>(0.003)  | -0.016*<br>(0.007)  | -0.027**<br>(0.009) |
| Social welfare spending per capita                    | 0.003<br>(0.002)    | 0.006<br>(0.004)    | 0.003<br>(0.004)    |
| Ratio of expenditure for livelihood protection        | -0.017<br>(0.032)   | 0.004<br>(0.082)    | -0.009<br>(0.101)   |
| Percent Foreign-born                                  | -0.072*<br>(0.029)  | -0.140*<br>(0.057)  | -0.145*<br>(0.070)  |
| Constant                                              | 2.203***<br>(0.149) | 2.437***<br>(0.265) | 2.672***<br>(0.317) |
| N of observations                                     | 10843               | 10843               | 8859                |
| N of individuals                                      | 4623                | 4623                | 3109                |
| N of prefectures                                      | 47                  | 47                  | 47                  |

Notes: Significance levels: \* 0.05; \*\* 0.01; \*\*\* 0.001; pooled cross-sectional, random- and fixed-effects panel data regression; JLPS data

## Supplementary Appendix S.4 – JLSP Analysis omitting top-up sample and applying Inverse Probability Weights

| Model Type<br>Sample                           | Model 1<br>Attitudes towards immigrants<br>Fixed-Effects<br>Stayers (without top-up) | Model 2<br>Attitudes towards immigrants<br>Fixed-Effects<br>Stayers (without top-up and with<br>attrition weights) |
|------------------------------------------------|--------------------------------------------------------------------------------------|--------------------------------------------------------------------------------------------------------------------|
|                                                |                                                                                      |                                                                                                                    |
| <i>Prefectural-level Variables</i>             |                                                                                      |                                                                                                                    |
| financial capability index                     | 0.103<br>(0.219)                                                                     | -0.014<br>(0.238)                                                                                                  |
| Unemployment Rate                              | -0.013<br>(0.040)                                                                    | -0.009<br>(0.048)                                                                                                  |
| Assistance Livelihood Rate                     | -0.025**<br>(0.009)                                                                  | -0.021*<br>(0.010)                                                                                                 |
| Social welfare spending per capita             | 0.004<br>(0.004)                                                                     | -0.001<br>(0.006)                                                                                                  |
| Ratio of expenditure for livelihood protection | -0.006<br>(0.103)                                                                    | -0.035<br>(0.110)                                                                                                  |
| Percent Foreign-born                           | -0.142*<br>(0.070)                                                                   | -0.166*<br>(0.082)                                                                                                 |
| Constant                                       | 2.624***<br>(0.321)                                                                  | 2.833***<br>(0.410)                                                                                                |
| N of observations                              | 8445                                                                                 | 7226                                                                                                               |
| N of individuals                               | 2942                                                                                 | 2380                                                                                                               |
| N of prefectures                               | 47                                                                                   | 47                                                                                                                 |

*Notes:* Significance levels: \* 0.05; \*\* 0.01; \*\*\* 0.001; fixed-effects panel data regression; models include all individual-level controls although not shown, including: employment status (including manual/non-manual classification); subjective social status; evaluation of household standard of living; housing-status; age given its associations with exclusionary attitudes towards immigrants; gender; marital status; education-level; year of survey

### Supplementary Appendix S.5 – Individual-, Municipality- and Prefectural-level drivers of Attitudes towards Immigration (PSPP)

|                                                         | Model 1             | Model 2             | Model 3             | Model 4             | Model 5             | Model 6             |
|---------------------------------------------------------|---------------------|---------------------|---------------------|---------------------|---------------------|---------------------|
| <i>Outcome</i>                                          | Attitudes towards   | Attitudes towards   | Attitudes towards   | Attitudes towards   | Attitudes towards   | Attitudes towards   |
| <i>Sample</i>                                           | immigrants          | immigrants          | immigrants          | immigrants          | immigrants          | immigrants          |
|                                                         | All                 | All                 | All                 | Excluding Shinjuku  | Excluding Shinjuku  | Excluding Shinjuku  |
| <i>Individual-level</i>                                 |                     |                     |                     |                     |                     |                     |
| Age                                                     | -0.005**<br>(0.001) | -0.005**<br>(0.001) | -0.005**<br>(0.002) | -0.004**<br>(0.002) | -0.004**<br>(0.002) | -0.004**<br>(0.002) |
| Sex (cf. Male)                                          |                     |                     |                     |                     |                     |                     |
| Female                                                  | -0.014<br>(0.021)   | -0.014<br>(0.021)   | -0.015<br>(0.021)   | -0.019<br>(0.022)   | -0.019<br>(0.022)   | -0.019<br>(0.022)   |
| Travelled to foreign countries (cf. No)                 |                     |                     |                     |                     |                     |                     |
| Yes                                                     | 0.135***<br>(0.027) | 0.135***<br>(0.027) | 0.138***<br>(0.027) | 0.139***<br>(0.027) | 0.141***<br>(0.027) | 0.141***<br>(0.027) |
| Lived in foreign countries (more than 1 month) (cf. No) |                     |                     |                     |                     |                     |                     |
| Yes                                                     | 0.131***<br>(0.039) | 0.131***<br>(0.039) | 0.126**<br>(0.039)  | 0.125**<br>(0.040)  | 0.126**<br>(0.040)  | 0.125**<br>(0.040)  |
| Live in the prefecture you were born? (cf. No)          |                     |                     |                     |                     |                     |                     |
| Yes                                                     | -0.066*<br>(0.032)  | -0.065*<br>(0.033)  | -0.071*<br>(0.033)  | -0.063*<br>(0.032)  | -0.062*<br>(0.030)  | -0.063*<br>(0.031)  |
| Subjective social status placement                      | 0.002<br>(0.018)    | 0.003<br>(0.017)    | 0.004<br>(0.018)    | 0.005<br>(0.019)    | 0.005<br>(0.018)    | 0.005<br>(0.018)    |
| Marital Status (cf. Married)                            |                     |                     |                     |                     |                     |                     |
| Unmarried (never married)                               | 0.086*<br>(0.034)   | 0.085*<br>(0.033)   | 0.082*<br>(0.032)   | 0.072*<br>(0.034)   | 0.072*<br>(0.033)   | 0.072*<br>(0.033)   |
| Separated/Bereaved/Other                                | -0.010<br>(0.043)   | -0.010<br>(0.044)   | -0.011<br>(0.044)   | -0.012<br>(0.044)   | -0.013<br>(0.045)   | -0.013<br>(0.045)   |
| Employment Status (cf. working)                         |                     |                     |                     |                     |                     |                     |
| Student                                                 | 0.140*<br>(0.063)   | 0.141*<br>(0.063)   | 0.135*<br>(0.064)   | 0.164*<br>(0.069)   | 0.162*<br>(0.070)   | 0.162*<br>(0.070)   |
| Unemployed                                              | 0.047<br>(0.075)    | 0.047<br>(0.074)    | 0.045<br>(0.073)    | 0.055<br>(0.075)    | 0.051<br>(0.074)    | 0.051<br>(0.074)    |



|                                                                   |                     |                    |                     |                     |                     |                   |
|-------------------------------------------------------------------|---------------------|--------------------|---------------------|---------------------|---------------------|-------------------|
| Not in work                                                       | -0.028<br>(0.028)   | -0.028<br>(0.029)  | -0.027<br>(0.029)   | -0.032<br>(0.028)   | -0.033<br>(0.028)   | -0.033<br>(0.028) |
| Qualifications (cf. Junior High School )<br>including high school | 0.106<br>(0.057)    | 0.102<br>(0.059)   | 0.102<br>(0.059)    | 0.105<br>(0.058)    | 0.099<br>(0.059)    | 0.099<br>(0.059)  |
| Junior technical college                                          | 0.125*<br>(0.051)   | 0.122*<br>(0.053)  | 0.124*<br>(0.053)   | 0.130*<br>(0.052)   | 0.126*<br>(0.054)   | 0.126*<br>(0.054) |
| University                                                        | 0.108<br>(0.055)    | 0.103<br>(0.058)   | 0.104<br>(0.058)    | 0.104<br>(0.056)    | 0.098<br>(0.059)    | 0.099<br>(0.058)  |
| Years in area                                                     | -0.001<br>(0.001)   | -0.001<br>(0.001)  | -0.001<br>(0.001)   | -0.001<br>(0.001)   | -0.001<br>(0.001)   | -0.001<br>(0.001) |
| <i>Prefecture-level</i>                                           |                     |                    |                     |                     |                     |                   |
| Financial capability index                                        | 0.248*<br>(0.126)   | 0.219<br>(0.123)   | 0.211*<br>(0.108)   | 0.24*<br>(0.121)    | 0.234*<br>(0.113)   | 0.230*<br>(0.114) |
| Unemployment Rate                                                 | -0.073<br>(0.050)   | -0.063<br>(0.048)  | -0.067<br>(0.039)   | -0.083<br>(0.046)   | -0.065<br>(0.043)   | -0.065<br>(0.042) |
| Assistance Livelihood Rate                                        | 0.003<br>(0.004)    | 0.002<br>(0.004)   | 0.002<br>(0.004)    | 0.004<br>(0.004)    | 0.002<br>(0.004)    | 0.002<br>(0.004)  |
| Social welfare spending per capita                                | 0.003<br>(0.002)    | 0.003<br>(0.002)   | 0.002<br>(0.002)    | 0.002<br>(0.002)    | 0.003<br>(0.002)    | 0.003<br>(0.002)  |
| Ratio of expenditure for livelihood protection                    | 0.013<br>(0.023)    | 0.017<br>(0.025)   | 0.010<br>(0.026)    | 0.011<br>(0.023)    | 0.012<br>(0.026)    | 0.011<br>(0.027)  |
| % foreign-born                                                    | -0.068**<br>(0.025) | -0.064*<br>(0.025) | -0.045<br>(0.027)   | -0.072**<br>(0.024) | -0.049<br>(0.025)   | -0.051<br>(0.028) |
| <i>City-level</i>                                                 |                     |                    |                     |                     |                     |                   |
| % non-completed high school                                       |                     | 0.012<br>(0.013)   | 0.010<br>(0.011)    |                     | 0.011<br>(0.011)    | 0.011<br>(0.011)  |
| % unemployed                                                      |                     | -0.016<br>(0.018)  | 0.002<br>(0.021)    |                     | 0.001<br>(0.019)    | 0.002<br>(0.021)  |
| % foreign-born                                                    |                     | 0.001<br>(0.008)   | -0.064*<br>(0.025)  |                     | -0.028**<br>(0.009) | -0.038<br>(0.029) |
| % foreign-born * % foreign-born                                   |                     |                    | 0.007***<br>(0.002) |                     |                     | 0.002<br>(0.004)  |

|                    |                     |                     |                     |                     |                     |                     |
|--------------------|---------------------|---------------------|---------------------|---------------------|---------------------|---------------------|
| Constant           | 2.611***<br>(0.211) | 2.612***<br>(0.204) | 2.683***<br>(0.189) | 2.707***<br>(0.215) | 2.590***<br>(0.189) | 2.610***<br>(0.210) |
| N (Individuals)    | 3446                | 3446                | 3446                | 3397                | 3397                | 3397                |
| N (Municipalities) | 60                  | 60                  | 60                  | 59                  | 59                  | 59                  |
| N (Prefectures)    | 24                  | 24                  | 24                  | 24                  | 24                  | 24                  |

---

*Notes:* Significance levels: \* 0.05; \*\* 0.01; \*\*\* 0.001; multi-level random-intercept linear regression; PSPP data

**Supplementary Appendix S.6 – Individual-, Municipality- and Prefectural-level drivers of Attitudes towards Immigration; excluding Shinjuku (PSPP)**

|                                                | Model 1                      | Model 2                      | Model 3                      |
|------------------------------------------------|------------------------------|------------------------------|------------------------------|
| <i>Outcome</i>                                 | Attitudes towards immigrants | Attitudes towards immigrants | Attitudes towards immigrants |
| <i>Sample</i>                                  | Excluding Shinjuku           | Excluding Shinjuku           | Excluding Shinjuku           |
| <i>Prefecture-level</i>                        |                              |                              |                              |
| Financial capability index                     | 0.240*<br>(0.121)            | 0.234*<br>(0.113)            | 0.230*<br>(0.114)            |
| Unemployment Rate                              | -0.083<br>(0.046)            | -0.065<br>(0.043)            | -0.065<br>(0.042)            |
| Assistance Livelihood Rate                     | 0.004<br>(0.004)             | 0.002<br>(0.004)             | 0.002<br>(0.004)             |
| Social welfare spending per capita             | 0.002<br>(0.002)             | 0.003<br>(0.002)             | 0.003<br>(0.002)             |
| Ratio of expenditure for livelihood protection | 0.011<br>(0.023)             | 0.012<br>(0.026)             | 0.011<br>(0.027)             |
| % foreign-born                                 | -0.072**<br>(0.024)          | -0.049<br>(0.025)            | -0.051<br>(0.028)            |
| <i>City-level</i>                              |                              |                              |                              |
| % non-completed high school                    |                              | 0.011<br>(0.011)             | 0.011<br>(0.011)             |
| % unemployed                                   |                              | 0.001<br>(0.019)             | 0.002<br>(0.021)             |
| % foreign-born                                 |                              | -0.028**<br>(0.009)          | -0.038<br>(0.029)            |
| % foreign-born * % foreign-born                |                              |                              | 0.002<br>(0.004)             |
| Constant                                       | 2.707***<br>(0.215)          | 2.590***<br>(0.189)          | 2.610***<br>(0.210)          |
| N (Individuals)                                | 3397                         | 3397                         | 3397                         |
| N (Municipalities)                             | 59                           | 59                           | 59                           |
| N (Prefectures)                                | 24                           | 24                           | 24                           |

*Notes:* Significance levels: \* 0.05; \*\* 0.01; \*\*\* 0.001; multi-level random-intercept linear regression; models contain all individual-level controls; models include all individual-level controls although not shown, including: employment status (including manual/non-manual classification); subjective social status; evaluation of household standard of living; housing-status; age given its associations with exclusionary attitudes towards immigrants; gender; marital status; education-level; whether a respondent has travelled to foreign countries and lived in a foreign country (1+ months); whether respondent live in the prefecture in which they were born, and years lived in current area

## Supplementary Appendix S.7 – Relationship between Municipality-level Immigrant-share and Putative Mechanisms of Contact and Threat

|                                                | Model 1             | Model 2              | Model 3              | Model 4              | Model 5                                  | Model 6                                  | Model 7            | Model 8           | Model 9              | Model 10             |
|------------------------------------------------|---------------------|----------------------|----------------------|----------------------|------------------------------------------|------------------------------------------|--------------------|-------------------|----------------------|----------------------|
| Outcome                                        | Local<br>Contact    | Local<br>Contact     | Threat -<br>Problems | Threat -<br>Problems | Threat – not<br>positively<br>contribute | Threat – not<br>positively<br>contribute | Threat -<br>jobs   | Threat -<br>jobs  | Threat -<br>cultural | Threat -<br>cultural |
| City-level Immigrant-share term                | <i>linear</i>       | <i>quadratic</i>     | <i>linear</i>        | <i>quadratic</i>     | <i>linear</i>                            | <i>quadratic</i>                         | <i>linear</i>      | <i>quadratic</i>  | <i>linear</i>        | <i>quadratic</i>     |
| Sample                                         | All                 | All                  | All                  | All                  | All                                      | All                                      | All                | All               | All                  | All                  |
| <i>Prefecture-level</i>                        |                     |                      |                      |                      |                                          |                                          |                    |                   |                      |                      |
| Financial capability index                     | 0.186<br>(0.374)    | 0.212<br>(0.394)     | 0.078<br>(0.205)     | 0.086<br>(0.205)     | -0.321*<br>(0.152)                       | -0.315*<br>(0.138)                       | -0.297<br>(0.283)  | -0.298<br>(0.281) | -0.096<br>(0.265)    | -0.091<br>(0.250)    |
| Unemployment Rate                              | 0.042<br>(0.113)    | 0.055<br>(0.130)     | 0.013<br>(0.070)     | 0.018<br>(0.079)     | 0.027<br>(0.065)                         | 0.031<br>(0.058)                         | 0.107<br>(0.109)   | 0.108<br>(0.106)  | -0.127<br>(0.109)    | -0.123<br>(0.102)    |
| Assistance Livelihood Rate                     | 0.009<br>(0.009)    | 0.010<br>(0.009)     | -0.001<br>(0.006)    | -0.001<br>(0.007)    | -0.003<br>(0.004)                        | -0.003<br>(0.004)                        | -0.011<br>(0.009)  | -0.011<br>(0.009) | 0.010<br>(0.007)     | 0.010<br>(0.007)     |
| social welfare spending per capita             | -0.007<br>(0.005)   | -0.004<br>(0.004)    | -0.002<br>(0.003)    | -0.001<br>(0.003)    | -0.005*<br>(0.002)                       | -0.005*<br>(0.002)                       | 0.003<br>(0.004)   | 0.003<br>(0.004)  | -0.006<br>(0.004)    | -0.005<br>(0.004)    |
| Ratio of expenditure for livelihood protection | -0.038<br>(0.047)   | -0.010<br>(0.041)    | -0.059<br>(0.044)    | -0.052<br>(0.047)    | 0.019<br>(0.030)                         | 0.024<br>(0.030)                         | -0.001<br>(0.049)  | 0.001<br>(0.050)  | 0.105**<br>(0.040)   | 0.111**<br>(0.040)   |
| % foreign-born                                 | -0.005<br>(0.084)   | -0.078<br>(0.084)    | -0.006<br>(0.049)    | -0.027<br>(0.053)    | 0.076*<br>(0.034)                        | 0.061<br>(0.033)                         | 0.058<br>(0.062)   | 0.052<br>(0.064)  | 0.021<br>(0.053)     | 0.005<br>(0.051)     |
| <i>Municipality-level</i>                      |                     |                      |                      |                      |                                          |                                          |                    |                   |                      |                      |
| % non-completed high school                    | -0.010<br>(0.030)   | -0.001<br>(0.019)    | 0.008<br>(0.020)     | 0.010<br>(0.017)     | -0.021<br>(0.015)                        | -0.019<br>(0.014)                        | 0.017<br>(0.019)   | 0.018<br>(0.021)  | 0.028<br>(0.016)     | 0.030*<br>(0.015)    |
| % unemployed                                   | -0.022<br>(0.084)   | -0.082<br>(0.082)    | 0.015<br>(0.034)     | -0.003<br>(0.041)    | 0.036<br>(0.028)                         | 0.023<br>(0.029)                         | 0.066<br>(0.046)   | 0.060<br>(0.050)  | 0.001<br>(0.042)     | -0.014<br>(0.042)    |
| % foreign-born                                 | 0.150***<br>(0.030) | 0.388***<br>(0.034)  | 0.010<br>(0.010)     | 0.081*<br>(0.036)    | -0.007<br>(0.008)                        | 0.042<br>(0.025)                         | -0.024*<br>(0.010) | -0.000<br>(0.046) | 0.003<br>(0.006)     | 0.057<br>(0.035)     |
| % foreign-born * % foreign-born                |                     | -0.025***<br>(0.003) |                      | -0.008*<br>(0.003)   |                                          | -0.005*<br>(0.002)                       |                    | -0.002<br>(0.004) |                      | -0.006<br>(0.003)    |

|                    |                     |                    |                  |                  |                  |                  |                     |                     |                     |                     |
|--------------------|---------------------|--------------------|------------------|------------------|------------------|------------------|---------------------|---------------------|---------------------|---------------------|
| Constant           | 1.764***<br>(0.533) | 1.525**<br>(0.497) | 0.397<br>(0.374) | 0.326<br>(0.375) | 0.136<br>(0.143) | 0.083<br>(0.147) | 2.234***<br>(0.435) | 2.207***<br>(0.430) | 2.697***<br>(0.382) | 2.637***<br>(0.376) |
| N (Individuals)    | 3346                | 3346               | 3346             | 3346             | 3346             | 3346             | 3346                | 3346                | 3346                | 3346                |
| N (Municipalities) | 60                  | 60                 | 60               | 60               | 60               | 60               | 60                  | 60                  | 60                  | 60                  |
| N (Prefectures)    | 24                  | 24                 | 24               | 24               | 24               | 24               | 24                  | 24                  | 24                  | 24                  |

---

*Notes:* Significance levels: \* 0.05; \*\* 0.01; \*\*\* 0.001; multi-level random-intercept linear regression; models contain all individual-level controls; models include all individual-level controls although not shown, including: employment status (including manual/non-manual classification); subjective social status; evaluation of household standard of living; housing-status; age given its associations with exclusionary attitudes towards immigrants; gender; marital status; education-level; whether a respondent has travelled to foreign countries and lived in a foreign country (1+ months); whether respondent live in the prefecture in which they were born, and years lived in current area

**Supplementary Appendix S.8 - Predicted intergroup contact scores across Municipality-level immigrant-share (PSPP)**

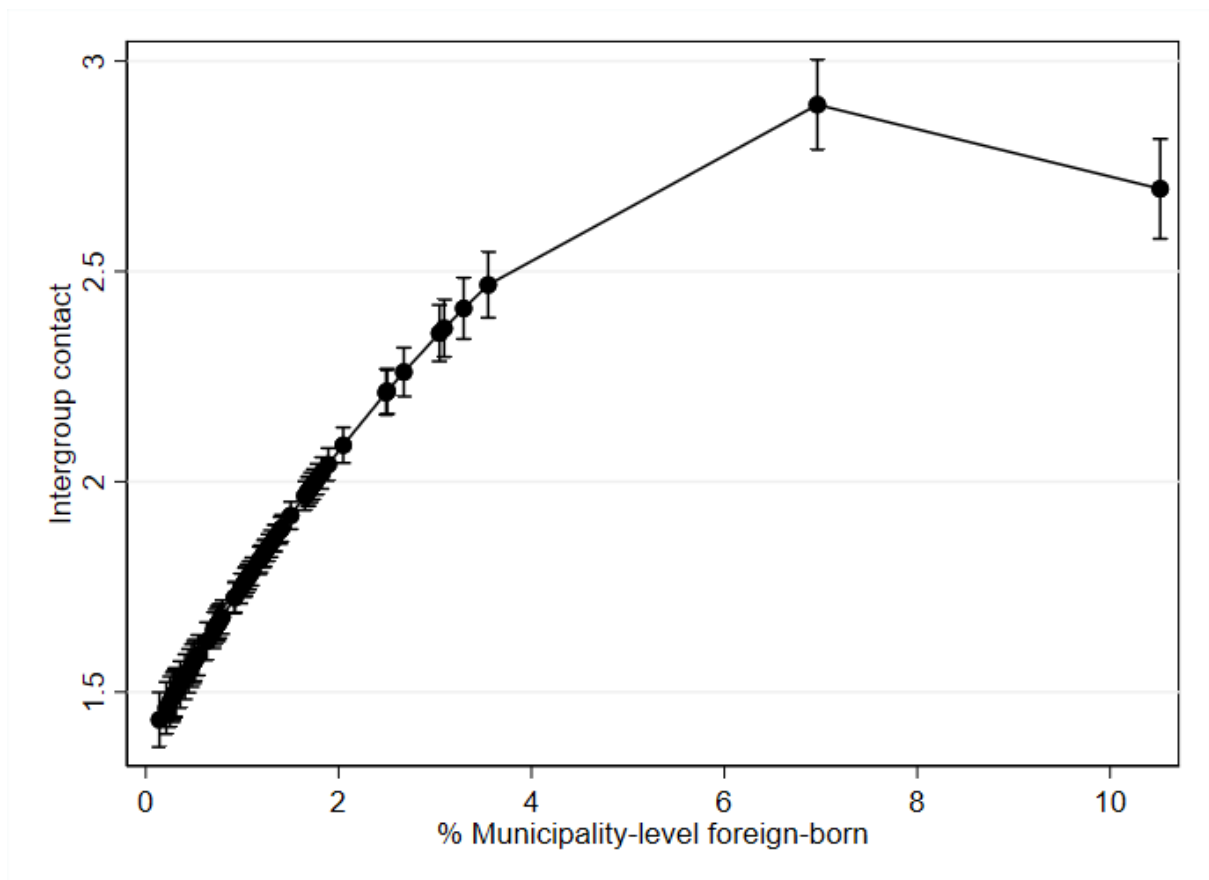

**Supplementary Appendix S.9 - Predicted 'perceived 'immigrant-problems' index' scores across Municipality-level immigrant-share (PSPP)**

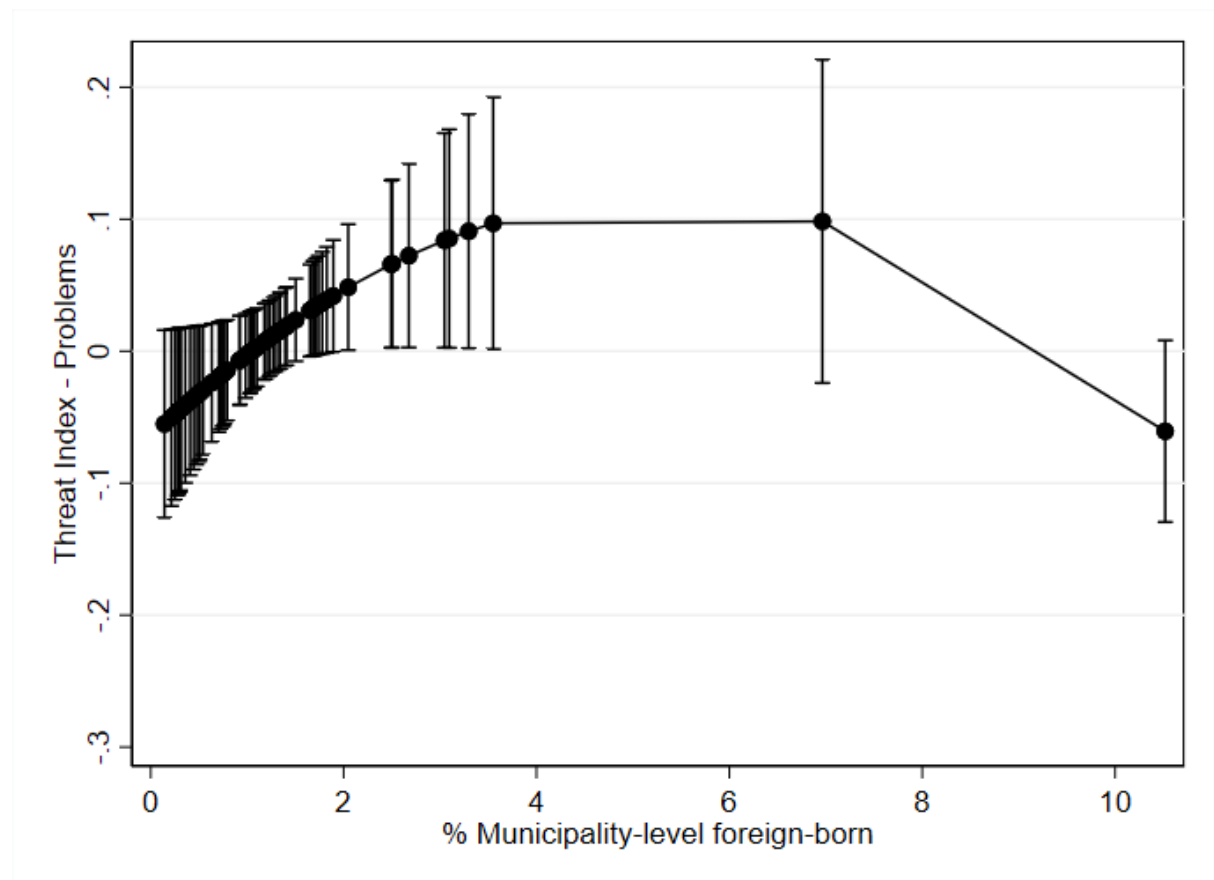

**Supplementary Appendix S.10 - Predicted ‘immigrants ‘not positively contribute to Japanese society’ scores across Municipality-level immigrant-share (PSPP)**

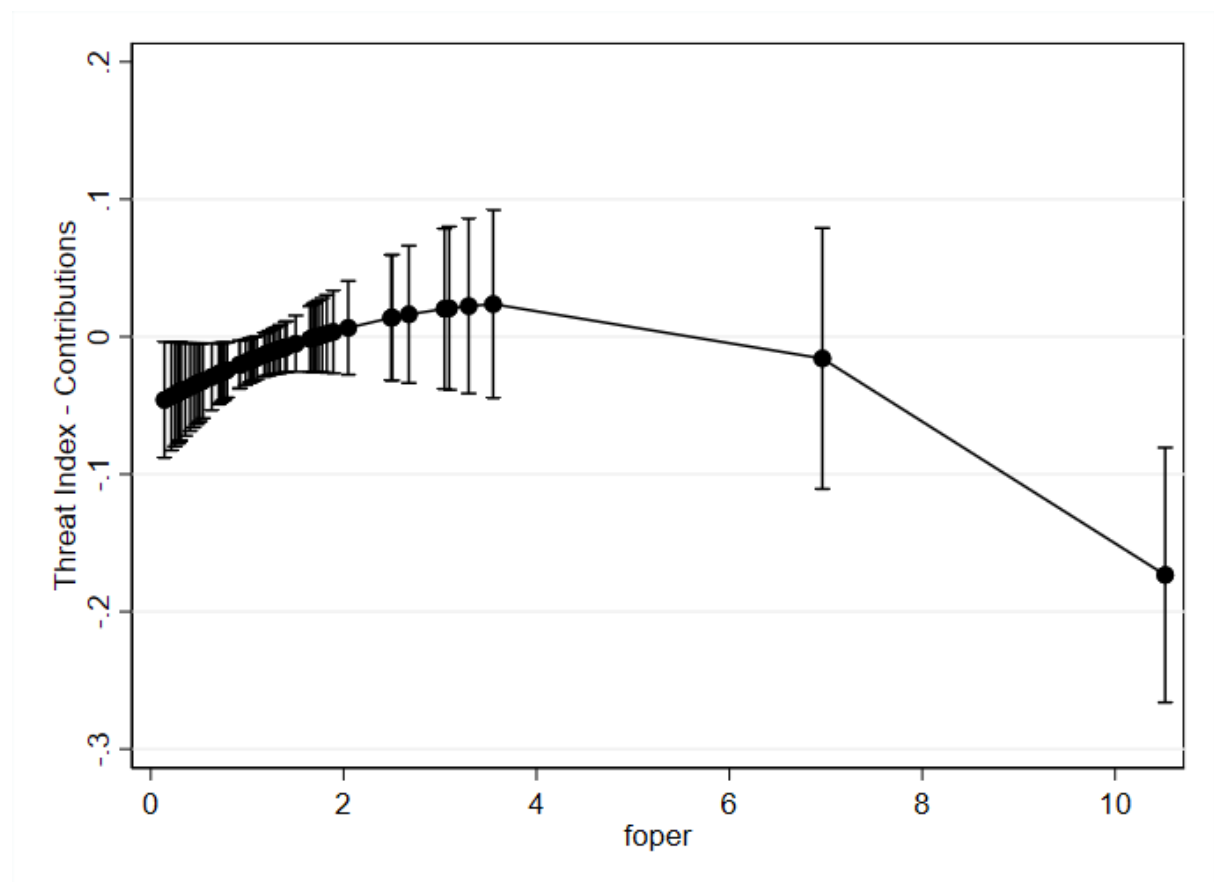



**Supplementary Appendix S.11 - Predicted 'immigration deprives Japanese of employment' scores across Municipality-level immigrant-share (PSPP)**

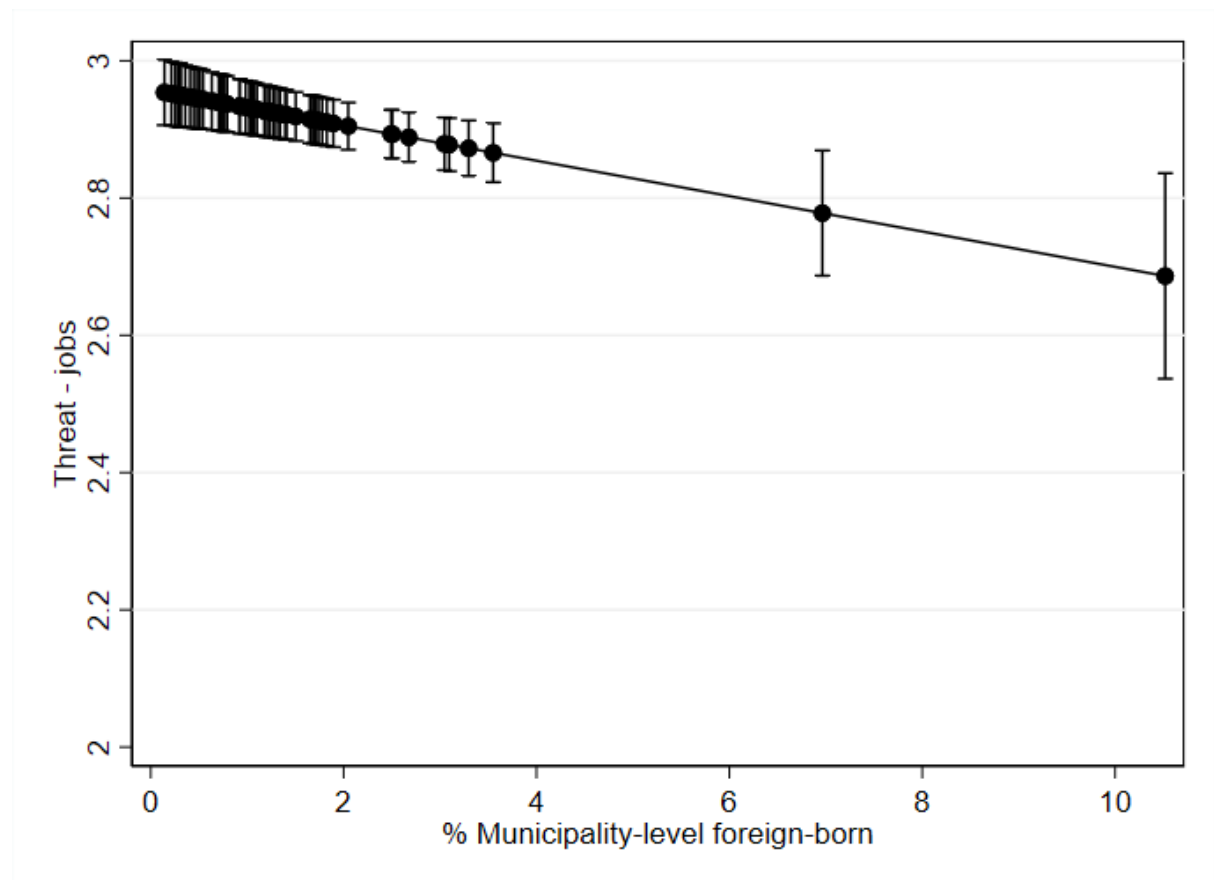

**Supplementary Appendix S.12 - Predicted 'perceptions that immigration will diversify Japanese culture' scores across Municipality-level immigrant-share (PSPP)**

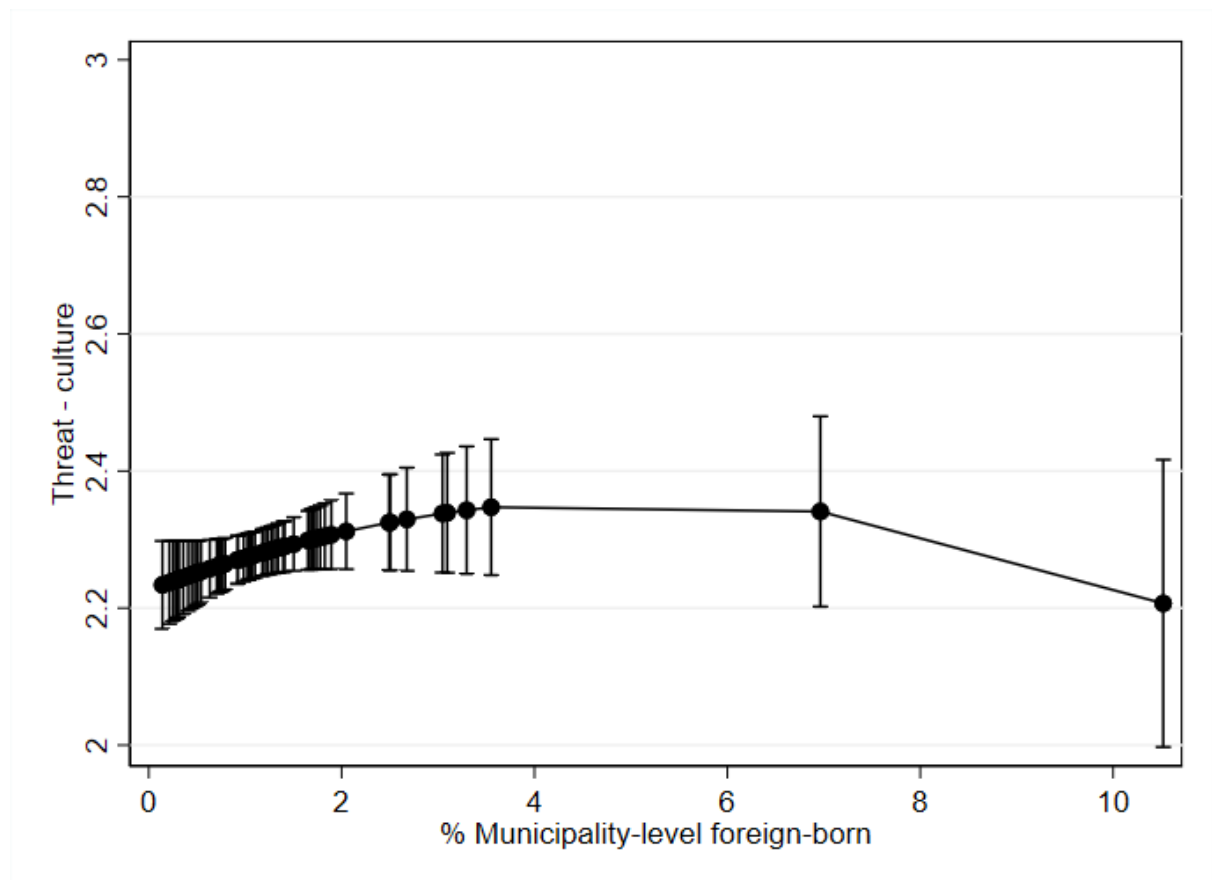

**Supplementary Appendix S.13 – Mediating role of intergroup contact and perceived-threat in the relationship between immigrant-share and attitudes towards immigrants (PSPP)**

|                                                                   | Model 1<br>Attitudes towards<br>immigrants | Model 2<br>Attitudes towards<br>immigrants | Model 3<br>Attitudes towards<br>immigrants | Model 4<br>Attitudes towards<br>immigrants |
|-------------------------------------------------------------------|--------------------------------------------|--------------------------------------------|--------------------------------------------|--------------------------------------------|
| <i>Individual-level</i>                                           |                                            |                                            |                                            |                                            |
| Age                                                               | -0.005**<br>(0.002)                        | -0.005***<br>(0.001)                       | -0.003**<br>(0.001)                        | -0.003**<br>(0.001)                        |
| Sex (cf. Male)                                                    |                                            |                                            |                                            |                                            |
| Female                                                            | -0.015<br>(0.021)                          | -0.022<br>(0.021)                          | -0.012<br>(0.017)                          | -0.018<br>(0.017)                          |
| Travelled to foreign countries (cf. No)                           |                                            |                                            |                                            |                                            |
| Yes                                                               | 0.138***<br>(0.027)                        | 0.133***<br>(0.027)                        | 0.072***<br>(0.021)                        | 0.069***<br>(0.020)                        |
| Lived in foreign countries (more than 1 month) (cf. No)           |                                            |                                            |                                            |                                            |
| Yes                                                               | 0.126**<br>(0.039)                         | 0.116**<br>(0.039)                         | 0.106**<br>(0.035)                         | 0.098**<br>(0.036)                         |
| Live in the prefecture you were born? (cf. No)                    |                                            |                                            |                                            |                                            |
| Yes                                                               | -0.071*<br>(0.033)                         | -0.067<br>(0.034)                          | -0.051*<br>(0.022)                         | -0.048*<br>(0.023)                         |
| Subjective social status placement                                | 0.004<br>(0.018)                           | 0.005<br>(0.018)                           | 0.018<br>(0.010)                           | 0.018<br>(0.010)                           |
| Marital Status (cf. Married)                                      |                                            |                                            |                                            |                                            |
| Unmarried (never married)                                         | 0.082*<br>(0.032)                          | 0.090**<br>(0.032)                         | 0.053<br>(0.030)                           | 0.059*<br>(0.030)                          |
| Separated/Bereaved/Other                                          | -0.011<br>(0.044)                          | -0.012<br>(0.044)                          | 0.002<br>(0.033)                           | 0.001<br>(0.033)                           |
| Employment Status (cf. working)                                   |                                            |                                            |                                            |                                            |
| Student                                                           | 0.135*<br>(0.064)                          | 0.131*<br>(0.063)                          | 0.071<br>(0.058)                           | 0.066<br>(0.058)                           |
| Unemployed                                                        | 0.045<br>(0.073)                           | 0.057<br>(0.075)                           | 0.031<br>(0.065)                           | 0.042<br>(0.066)                           |
| Not in work                                                       | -0.027<br>(0.029)                          | -0.003<br>(0.029)                          | -0.033<br>(0.028)                          | -0.012<br>(0.028)                          |
| Qualifications (cf. Junior High School )<br>including high school | 0.102<br>(0.059)                           | 0.090<br>(0.058)                           | 0.085<br>(0.047)                           | 0.075<br>(0.046)                           |
| Junior technical college                                          | 0.124*<br>(0.053)                          | 0.104<br>(0.054)                           | 0.109*<br>(0.043)                          | 0.092*<br>(0.043)                          |
| University                                                        | 0.104<br>(0.058)                           | 0.089<br>(0.058)                           | 0.036<br>(0.046)                           | 0.024<br>(0.046)                           |
| Years in area                                                     | -0.001<br>(0.001)                          | -0.001<br>(0.001)                          | -0.001<br>(0.001)                          | -0.000<br>(0.001)                          |
| <i>Prefecture-level</i>                                           |                                            |                                            |                                            |                                            |
| Financial capability index                                        | 0.211*<br>(0.108)                          | 0.192<br>(0.101)                           | 0.126<br>(0.081)                           | 0.112<br>(0.077)                           |
| Unemployment Rate                                                 | -0.067<br>(0.039)                          | -0.071<br>(0.041)                          | -0.058<br>(0.037)                          | -0.061<br>(0.038)                          |

|                                                |                     |                      |                      |                      |
|------------------------------------------------|---------------------|----------------------|----------------------|----------------------|
| Assistance Livelihood Rate                     | 0.002<br>(0.004)    | 0.002<br>(0.004)     | 0.002<br>(0.003)     | 0.001<br>(0.003)     |
| Social welfare spending per capita             | 0.002<br>(0.002)    | 0.002<br>(0.002)     | -0.000<br>(0.001)    | 0.000<br>(0.002)     |
| Ratio of expenditure for livelihood protection | 0.010<br>(0.026)    | 0.011<br>(0.026)     | 0.009<br>(0.016)     | 0.009<br>(0.015)     |
| % foreign-born                                 | -0.045<br>(0.027)   | -0.038<br>(0.026)    | -0.033<br>(0.019)    | -0.027<br>(0.017)    |
| <i>City-level</i>                              |                     |                      |                      |                      |
| % non-completed high school                    | 0.010<br>(0.011)    | 0.010<br>(0.012)     | 0.009<br>(0.005)     | 0.009<br>(0.006)     |
| % unemployed                                   | 0.002<br>(0.021)    | 0.008<br>(0.022)     | 0.008<br>(0.019)     | 0.014<br>(0.020)     |
| % foreign-born                                 | -0.064*<br>(0.025)  | -0.098***<br>(0.028) | -0.026<br>(0.016)    | -0.056**<br>(0.019)  |
| % foreign-born * % foreign-born                | 0.007***<br>(0.002) | 0.009***<br>(0.002)  | 0.003*<br>(0.001)    | 0.005**<br>(0.002)   |
| <i>Individual-level Mechanisms</i>             |                     |                      |                      |                      |
| Local Contact                                  |                     | 0.089***<br>(0.011)  |                      | 0.077***<br>(0.012)  |
| Threat - Problems                              |                     |                      | -0.274***<br>(0.011) | -0.279***<br>(0.012) |
| Threat – not positively contribute             |                     |                      | -0.312***<br>(0.020) | -0.307***<br>(0.020) |
| Threat - jobs                                  |                     |                      | -0.014<br>(0.014)    | -0.014<br>(0.014)    |
| Threat - cultural                              |                     |                      | -0.055***<br>(0.015) | -0.052***<br>(0.015) |
| Constant                                       | 2.683***<br>(0.189) | 2.546***<br>(0.192)  | 2.982***<br>(0.170)  | 2.855***<br>(0.170)  |
| N (Individuals)                                | 3446                | 3446                 | 3446                 | 3446                 |
| N (Municipalities)                             | 60                  | 60                   | 60                   | 60                   |
| N (Prefectures)                                | 24                  | 24                   | 24                   | 24                   |

Notes: Significance levels: \* 0.05; \*\* 0.01; \*\*\* 0.001; multi-level random-intercept linear regression; PSPP data

**Supplementary Appendix S.14 – Relationship between City-level Immigrant-share and Putative Mechanisms of Contact and Threat; excluding Shinjuku (PSPP)**

|                                                   | Model 1             | Model 2              | Model 3              | Model 4              | Model 5                                  | Model 6                                  | Model 7           | Model 8           | Model 9              | Model 10             |
|---------------------------------------------------|---------------------|----------------------|----------------------|----------------------|------------------------------------------|------------------------------------------|-------------------|-------------------|----------------------|----------------------|
| Outcome                                           | Local<br>Contact    | Local<br>Contact     | Threat -<br>Problems | Threat -<br>Problems | Threat – not<br>positively<br>contribute | Threat – not<br>positively<br>contribute | Threat - jobs     | Threat - jobs     | Threat -<br>cultural | Threat -<br>cultural |
| City-level Immigrant-share term                   | <i>linear</i>       | <i>quadratic</i>     | <i>linear</i>        | <i>quadratic</i>     | <i>linear</i>                            | <i>quadratic</i>                         | <i>linear</i>     | <i>quadratic</i>  | <i>linear</i>        | <i>quadratic</i>     |
| Sample                                            | Excl.<br>Shinjuku   | Excl.<br>Shinjuku    | Excl.<br>Shinjuku    | Excl.<br>Shinjuku    | Excl.<br>Shinjuku                        | Excl.<br>Shinjuku                        | Excl.<br>Shinjuku | Excl.<br>Shinjuku | Excl.<br>Shinjuku    | Excl.<br>Shinjuku    |
| <i>Prefecture-level</i>                           |                     |                      |                      |                      |                                          |                                          |                   |                   |                      |                      |
| financial capability index                        | 0.148<br>(0.375)    | 0.220<br>(0.398)     | 0.060<br>(0.206)     | 0.056<br>(0.210)     | -0.330*<br>(0.144)                       | -0.319*<br>(0.141)                       | -0.310<br>(0.281) | -0.318<br>(0.278) | -0.109<br>(0.262)    | -0.081<br>(0.252)    |
| Unemployment Rate                                 | 0.046<br>(0.118)    | 0.056<br>(0.131)     | 0.014<br>(0.077)     | 0.014<br>(0.076)     | 0.025<br>(0.061)                         | 0.027<br>(0.058)                         | 0.109<br>(0.106)  | 0.108<br>(0.106)  | -0.125<br>(0.107)    | -0.121<br>(0.099)    |
| Assistance Livelihood Rate                        | 0.011<br>(0.009)    | 0.010<br>(0.009)     | -0.001<br>(0.006)    | -0.001<br>(0.006)    | -0.002<br>(0.004)                        | -0.002<br>(0.004)                        | -0.010<br>(0.009) | -0.010<br>(0.009) | 0.011<br>(0.007)     | 0.010<br>(0.007)     |
| Social welfare spending per capita                | -0.007<br>(0.004)   | -0.004<br>(0.004)    | -0.002<br>(0.003)    | -0.002<br>(0.003)    | -0.005*<br>(0.002)                       | -0.005*<br>(0.002)                       | 0.003<br>(0.004)  | 0.002<br>(0.004)  | -0.006<br>(0.004)    | -0.005<br>(0.004)    |
| Ratio of expenditure for livelihood<br>protection | -0.023<br>(0.043)   | -0.009<br>(0.041)    | -0.054<br>(0.047)    | -0.055<br>(0.047)    | 0.022<br>(0.030)                         | 0.024<br>(0.030)                         | 0.002<br>(0.049)  | -0.000<br>(0.049) | 0.108**<br>(0.040)   | 0.113**<br>(0.040)   |
| % foreign-born                                    | -0.040<br>(0.083)   | -0.081<br>(0.085)    | -0.021<br>(0.050)    | -0.019<br>(0.053)    | 0.067*<br>(0.033)                        | 0.061<br>(0.033)                         | 0.053<br>(0.062)  | 0.058<br>(0.063)  | 0.016<br>(0.052)     | 0.001<br>(0.051)     |
| <i>City-level</i>                                 |                     |                      |                      |                      |                                          |                                          |                   |                   |                      |                      |
| % non-completed high school                       | -0.007<br>(0.023)   | -0.001<br>(0.019)    | 0.009<br>(0.018)     | 0.009<br>(0.018)     | -0.020<br>(0.014)                        | -0.019<br>(0.014)                        | 0.018<br>(0.020)  | 0.017<br>(0.020)  | 0.028<br>(0.015)     | 0.030<br>(0.015)     |
| % unemployed                                      | -0.066<br>(0.081)   | -0.082<br>(0.082)    | -0.004<br>(0.039)    | -0.002<br>(0.039)    | 0.026<br>(0.029)                         | 0.023<br>(0.029)                         | 0.058<br>(0.049)  | 0.060<br>(0.049)  | -0.006<br>(0.042)    | -0.013<br>(0.043)    |
| % foreign-born                                    | 0.235***<br>(0.026) | 0.403***<br>(0.048)  | 0.046***<br>(0.013)  | 0.036<br>(0.036)     | 0.021*<br>(0.013)                        | 0.037<br>(0.034)                         | -0.009<br>(0.019) | -0.033<br>(0.061) | 0.017<br>(0.013)     | 0.081<br>(0.049)     |
| % foreign-born * % foreign-born                   |                     | -0.028***<br>(0.007) |                      | 0.002<br>(0.004)     |                                          | -0.004<br>(0.004)                        |                   | 0.004<br>(0.008)  |                      | -0.011<br>(0.007)    |

|                    |                     |                    |                  |                  |                  |                  |                     |                     |                     |                     |
|--------------------|---------------------|--------------------|------------------|------------------|------------------|------------------|---------------------|---------------------|---------------------|---------------------|
| Constant           | 1.794***<br>(0.513) | 1.485**<br>(0.506) | 0.380<br>(0.385) | 0.400<br>(0.392) | 0.059<br>(0.150) | 0.009<br>(0.163) | 2.307***<br>(0.451) | 2.354***<br>(0.439) | 2.697***<br>(0.384) | 2.572***<br>(0.382) |
| N (Individuals)    | 3297                | 3297               | 3297             | 3297             | 3297             | 3297             | 3297                | 3297                | 3297                | 3297                |
| N (Municipalities) | 59                  | 59                 | 59               | 59               | 59               | 59               | 59                  | 59                  | 59                  | 59                  |
| N (Prefectures)    | 24                  | 24                 | 24               | 24               | 24               | 24               | 24                  | 24                  | 24                  | 24                  |

---

*Notes:* Significance levels: \* 0.05; \*\* 0.01; \*\*\* 0.001; multi-level random-intercept linear regression; models contain all individual-level controls; models include all individual-level controls although not shown, including: employment status (including manual/non-manual classification); subjective social status; evaluation of household standard of living; housing-status; age given its associations with exclusionary attitudes towards immigrants; gender; marital status; education-level; whether a respondent has travelled to foreign countries and lived in a foreign country (1+ months); whether respondent live in the prefecture in which they were born, and years lived in current area

### Supplementary Appendix S.15 – Mediation analysis of contact and threat; excluding Shinjuku (PSPP)

|                                                | Model 1                      | Model 2                      | Model 3                      | Model 4                      |
|------------------------------------------------|------------------------------|------------------------------|------------------------------|------------------------------|
| Outcome                                        | Attitudes towards immigrants | Attitudes towards immigrants | Attitudes towards immigrants | Attitudes towards immigrants |
| Sample                                         | Excl. Shinjuku               | Excl. Shinjuku               | Excl. Shinjuku               | Excl. Shinjuku               |
| <i>Prefecture-level</i>                        |                              |                              |                              |                              |
| financial capability index                     | 0.234*<br>(0.113)            | 0.222*<br>(0.107)            | 0.137<br>(0.083)             | 0.128<br>(0.080)             |
| Unemployment Rate                              | -0.065<br>(0.043)            | -0.067<br>(0.046)            | -0.058<br>(0.039)            | -0.060<br>(0.040)            |
| Assistance Livelihood Rate                     | 0.002<br>(0.004)             | 0.001<br>(0.004)             | 0.002<br>(0.003)             | 0.001<br>(0.003)             |
| social welfare spending per capita             | 0.003<br>(0.002)             | 0.003<br>(0.002)             | 0.000<br>(0.001)             | 0.001<br>(0.002)             |
| ratio of expenditure for livelihood protection | 0.012<br>(0.026)             | 0.013<br>(0.025)             | 0.009<br>(0.016)             | 0.010<br>(0.014)             |
| % foreign-born                                 | -0.049<br>(0.025)            | -0.048<br>(0.025)            | -0.037<br>(0.019)            | -0.034*<br>(0.017)           |
| <i>City-level</i>                              |                              |                              |                              |                              |
| % non-completed high school                    | 0.011<br>(0.011)             | 0.012<br>(0.013)             | 0.009<br>(0.005)             | 0.010<br>(0.006)             |
| % unemployed                                   | 0.001<br>(0.019)             | 0.006<br>(0.020)             | 0.009<br>(0.019)             | 0.013<br>(0.020)             |
| % foreign-born                                 | -0.028**<br>(0.009)          | -0.049***<br>(0.010)         | -0.011<br>(0.006)            | -0.029***<br>(0.007)         |
| <i>Individual-level Mechanisms</i>             |                              |                              |                              |                              |
| Local Contact                                  |                              | 0.088***<br>(0.011)          |                              | 0.078***<br>(0.012)          |
| Threat - Problems                              |                              |                              | -0.278***<br>(0.010)         | -0.282***<br>(0.011)         |
| Threat – not positively contribute             |                              |                              | -0.313***<br>(0.021)         | -0.307***<br>(0.021)         |
| Threat - jobs                                  |                              |                              | -0.014<br>(0.014)            | -0.013<br>(0.014)            |
| Threat - cultural                              |                              |                              | -0.055***<br>(0.015)         | -0.052***<br>(0.015)         |
| Constant                                       | 2.590***<br>(0.189)          | 2.429***<br>(0.198)          | 2.901***<br>(0.161)          | 2.751***<br>(0.167)          |
| N (Individuals)                                | 3297                         | 3297                         | 3297                         | 3297                         |
| N (Municipalities)                             | 59                           | 59                           | 59                           | 59                           |
| N (Prefectures)                                | 24                           | 24                           | 24                           | 24                           |

*Notes:* Significance levels: \* 0.05; \*\* 0.01; \*\*\* 0.001; multi-level random-intercept linear regression; models contain all individual-level controls; models include all individual-level controls although not shown, including: employment status (including manual/non-manual classification); subjective social status; evaluation of household standard of living; housing-status; age given its associations with exclusionary attitudes towards

immigrants; gender; marital status; education-level; whether a respondent has travelled to foreign countries and lived in a foreign country (1+ months); whether respondent live in the prefecture in which they were born, and years lived in current area



**Supplementary Appendix S.16 – Additional robustness tests of fixed-effects JLPS analysis, examining causal ordering (Arellano-Bond Estimator) and calculation of treatment effects and relative degree of selection under proportional selection of observables and unobservables**

We examine the temporal ordering of the immigrant-share/immigrant-attitudes relationship, by testing whether lagged immigrant-share predicts present immigration-attitudes (and vice versa). For immigrant-share to causally affect anti-immigrant attitudes we would expect a change in the former to precede a change in the latter. To properly test this (especially under conditions of small  $T$  large  $N$ , as in our case), we apply Arellano–Bond linear dynamic panel modelling, which uses the (second order) lags of our outcome as instruments in a first-difference model<sup>i</sup>. This allows us to robustly explore causal ordering of effects but also further adjust our longitudinal models for lagged outcome-scores, helping address omitted variable bias and/or serial correlation (Arellano and Bond 1991, Torfason and Ingram 2010). To explore this, we first replicate our main model applying a fixed-effects approach but restricting the sample to stayers (*see* Model 3, Table 2 in the main text). We then replicate this model but apply Arellano-Bond linear dynamic panel modelling. This tests the association between lagged independent variables (at  $t_{-2}$ , given our key variables are measured every two-years) and immigration-attitudes at time  $t_0$ , whilst also adjusting for immigration attitudes at  $t_{-2}$ <sup>ii</sup>. We observe that lagged immigrant-share continues to positively predict current immigration attitudes, strengthening the causal identification<sup>iii</sup>.

### Arellano-Bond Estimator testing lagged immigrant-share (JLPS)

|                                                 | Model 1                                | Model 2                                  |
|-------------------------------------------------|----------------------------------------|------------------------------------------|
| Outcome                                         | Attitudes towards immigrants ( $t_0$ ) | Attitudes towards immigrants ( $t_0$ )   |
| Model Type                                      | Fixed-Effects                          | Arellano–Bond linear dynamic panel model |
| Time ( $t$ ) independent variables are measured | $t_0$                                  | $t_{-2}$                                 |
| Observations Sample                             | Prefecture Stayers                     | Prefecture Stayers                       |
| <i>Prefectural-level Variables</i>              |                                        |                                          |
| financial capability index                      | 0.154<br>(0.216)                       | 0.364<br>(0.322)                         |
| Unemployment Rate                               | -0.016<br>(0.039)                      | -0.031<br>(0.056)                        |
| Assistance Livelihood Rate                      | -0.027**<br>(0.009)                    | -0.003<br>(0.012)                        |
| Social welfare spending per capita              | 0.003<br>(0.004)                       | 0.008<br>(0.006)                         |
| Ratio of expenditure for livelihood protection  | -0.009<br>(0.101)                      | -0.013<br>(0.125)                        |
| Percent Foreign-born                            | -0.145*<br>(0.070)                     | -0.232*<br>(0.105)                       |
| <i>Lagged Dependent Variable</i>                |                                        |                                          |
| Attitudes towards immigrants ( $t_{-2}$ )       |                                        | 0.084**<br>(0.021)                       |
| Constant                                        | 2.672***<br>(0.317)                    | 2.642***<br>(0.447)                      |
| N of observations                               | 8859                                   | 3040                                     |
| N of individuals                                | 3109                                   | 2329                                     |
| N of prefectures                                | 47                                     | 47                                       |

Notes: Significance levels: \* 0.05; \*\* 0.01; \*\*\* 0.001; random- and fixed-effects panel data regressions;  $t$  = time at which variable is measured; JLPS data

A second test which aims to strengthen causal identification is by attempting to adjust for potential confounding effects stemming from time-variant omitted variables (Oster 2019). As already mentioned, we adjust our fixed-effects models for potential confounders available in the data. However, these control variables do not necessarily guarantee that we obtain estimates robust to the omitted variables bias. To go some way towards dealing with this concern, we follow Oster (2019) is assuming the omitted variable bias is a function of R-squared after considering relevant omitted variables and the balance between the observable controls and unobserved ones. Her proposed method enables us to estimate the bound estimate of the effect of the variable of interest under the (hypothetical) condition that we ignore any relevant omitted

variables. To obtain the bound estimate, we specify two components (as part of the ‘psacalc’ package - Stata). One is the maximum R-squared in considering omitted variables, and the other is the balance between the observable controls and unobserved ones. Oster (2019) suggests the former is  $R_{max}$  and the latter is  $\delta$ .  $\delta = 1$ , which means the observed and unobserved covariates have equal impacts on the bias (based on Oster’s (2019) recommendation). Ideally,  $R_{max}$  should be 1 if we control all covariates relevant to the outcome. In non-random/survey data, however, this can rarely occur because there are any idiosyncratic errors. Oster (2019) proposes 1.3 times the estimated R-squared as a guideline (from analyzing published economics papers using the survey experiments with randomization). In our case,  $1.3 \times R_{within}$  will be a possible upper bound of R-squared after adjusting the omitted variable bias. Our FE estimate and the estimated effect under the condition of  $R_{max} = 1.3 \times R_{within}$  and  $\delta = 1$  compose a bound estimate. On performing the test under these specifications we find that the bounded estimates exclude zero (% foreigner coefficient: -0.17) and lies within the 95% confidence intervals of the original, lower-bounded fixed-effects coefficient, providing greater confidence that our finding remain robust even in the presence of potentially omitted time-variant covariates. Findings also supported this conclusion under condition of  $R_{max} = 2.2 \times R_{within}$ .

## **Bibliography:**

- Arellano, M. and S. Bond (1991). "Some Tests of Specification for Panel Data: Monte Carlo Evidence and an Application to Employment Equations." The Review of Economic Studies **58**(2): 277-297.
- Oster, E. (2019). "Unobservable Selection and Coefficient Stability: Theory and Evidence." Journal of Business and Economic Statistics **37**(2): 187–204.

Torfason, M. T. and P. Ingram (2010). "The Global Rise of Democracy: A Network Account." American Sociological Review **75**(3): 355-377.

---

<sup>i</sup> In reported models, all covariates are treated as exogenous. However, testing specifications of endogenous covariates (including prefectural characteristics) did not change the substantive findings.

<sup>ii</sup> Serial correlation structure tests show we reject no autocorrelation of order 1 and cannot reject autocorrelation of order 2. The Sargan test presents evidence in support of the null hypothesis that the over-identifying restrictions are valid. These provide evidence that the Arellano–Bond model assumptions are satisfied.

<sup>iii</sup> Lagged immigration attitudes did not predict present immigrant-share, suggesting negative changes in attitudes did not precede positive changes in immigrant-share.
